# Supplementary material for: Distribution of single-walled carbon nanotubes in pyrene containing liquid crystalline asymmetric zinc phthalocyanine matrix
Source: Royal Society of Chemistry journal article supplement (doi:10.1039/c3dt52736k), 2013-12-04
Supplement: c3dt52736k.pdf [file c3dt52736k.pdf]

# **Distribution of Single-Walled Carbon Nanotubes in matrix of liquid crystalline Pyrene Containing Asymmetric Zinc Phthalocyanine**

**Sinem Tuncel<sup>a</sup>, Esra Nur Kaya<sup>a,b</sup>, Mahmut Durmuş<sup>\*a</sup>, Tamara Basova<sup>\*c</sup>, Ayşe Gül Gürek<sup>a</sup>, Vefa Ahsen<sup>a</sup>, Hikmat Banimuslem<sup>d</sup>, Aseel Hassan<sup>d</sup>**

*<sup>a</sup>Gebze Institute of Technology, Department of Chemistry, P.O. Box: 141, 41400, Gebze, Kocaeli, Turkey*

*Fax: (+)90(262)605 31 01;E-mail: durmus@gyte.edu.tr*

*<sup>b</sup>Marmara University, Faculty of Art and Science, Department of Chemistry, 34722 Kadikoy-Istanbul, Turkey*

*<sup>c</sup>Nikolaev Institute of Inorganic Chemistry SB RAS, Novosibirsk, 630090, Russia*

*<sup>d</sup>Materials and Engineering Research Institute, Sheffield Hallam University, Sheffield S1 1WB, UK*

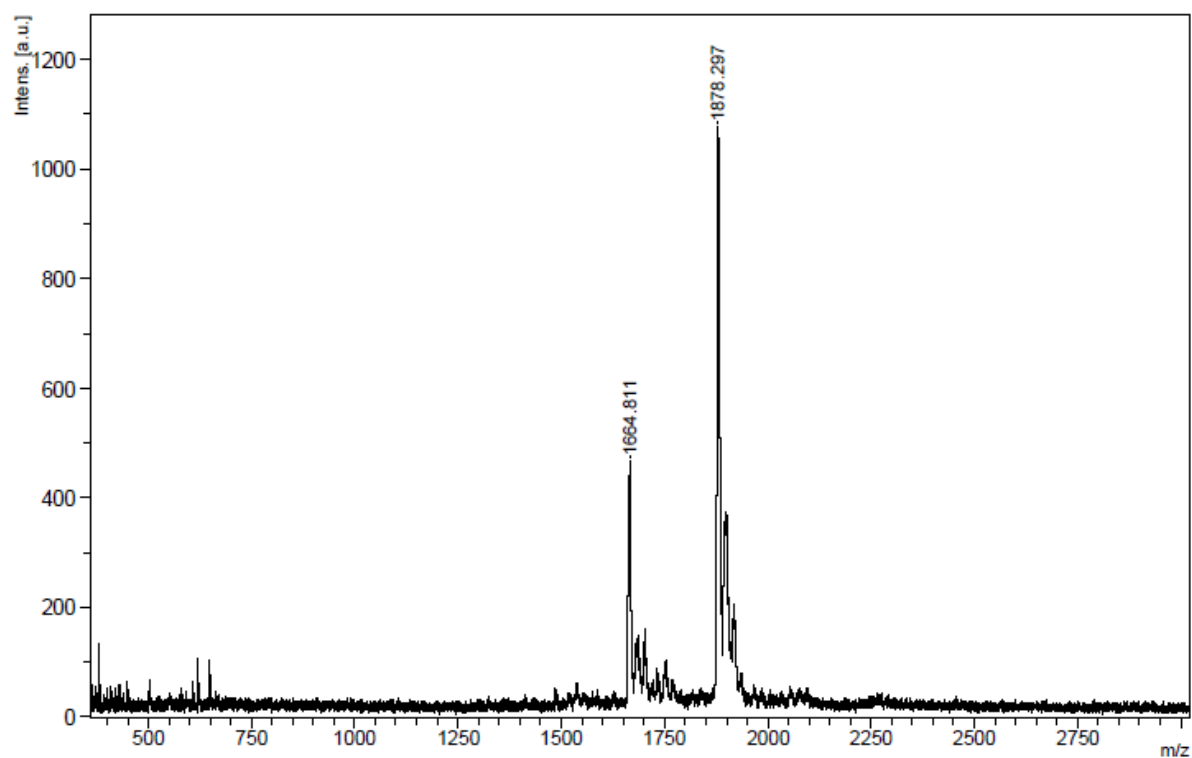

**Figure S1.** MALDI-TOF mass spectrum of compound 3.

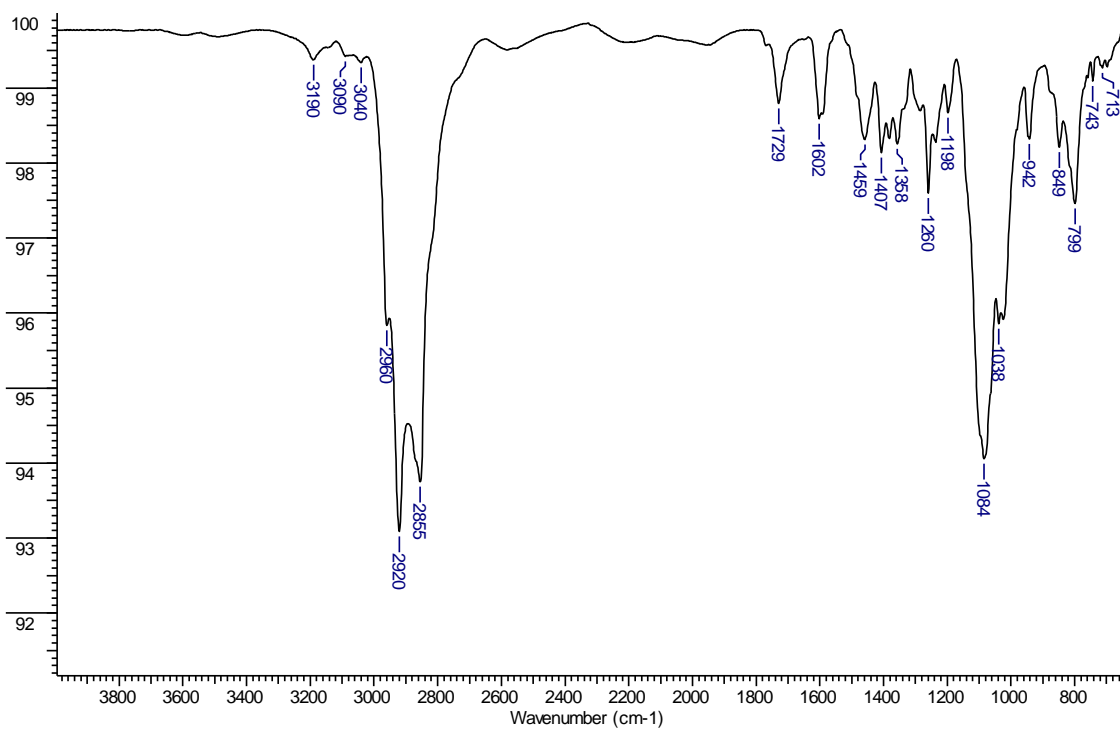

**Figure S2.** FT-IR spectrum of compound 3.

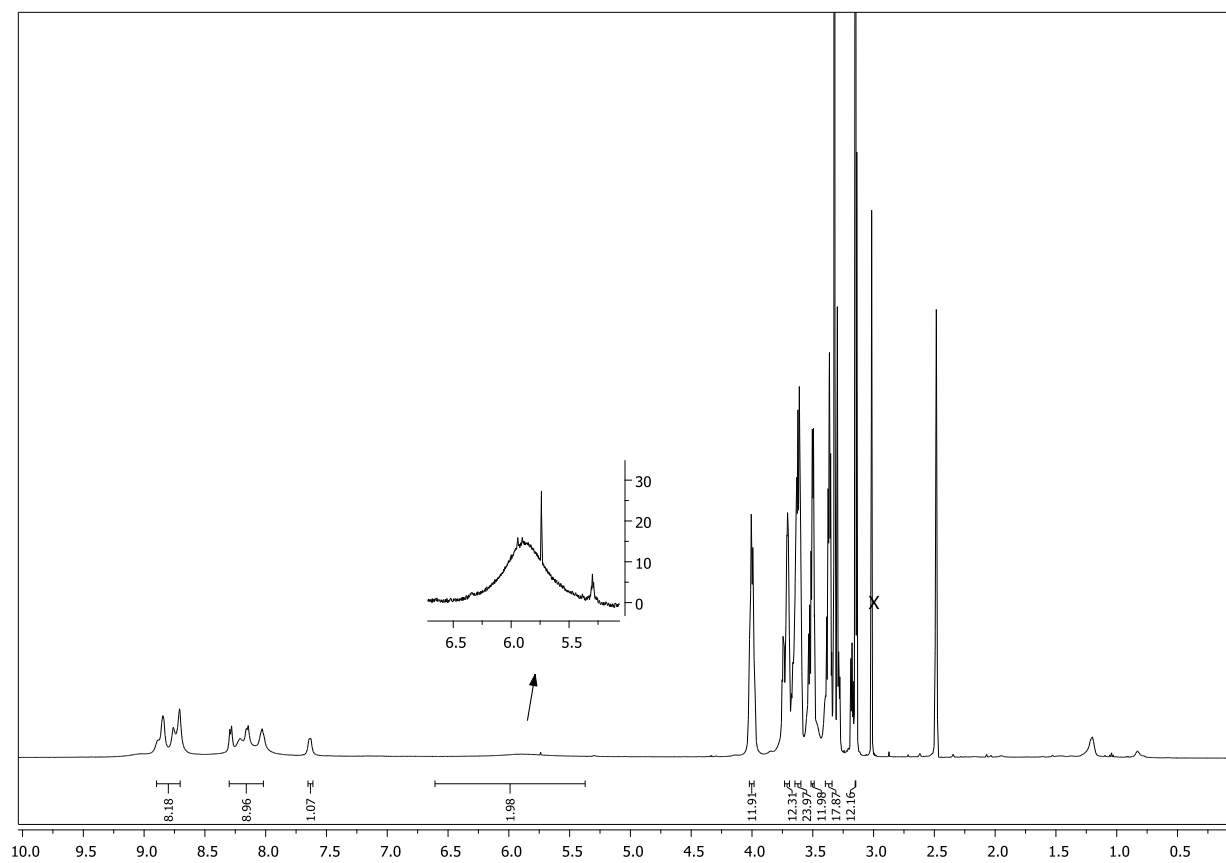

**Figure S3.**  $^1\text{H-NMR}$  spectrum of compound **3** ( $\text{DMSO-d}_6$ ).

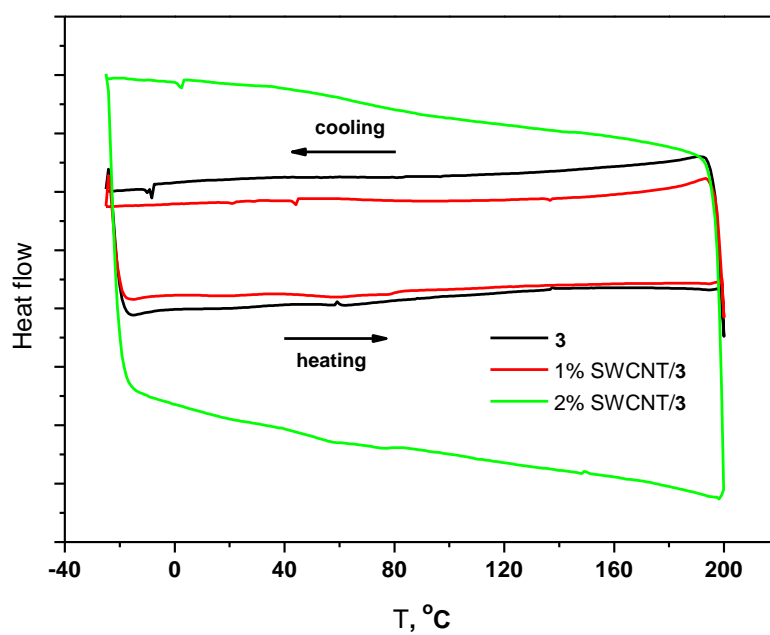

**Figure S4.** DSC spectra of compound **3** and its composites (third heating-cooling cycle,  $10^\circ\text{C}\cdot\text{min}^{-1}$ ).

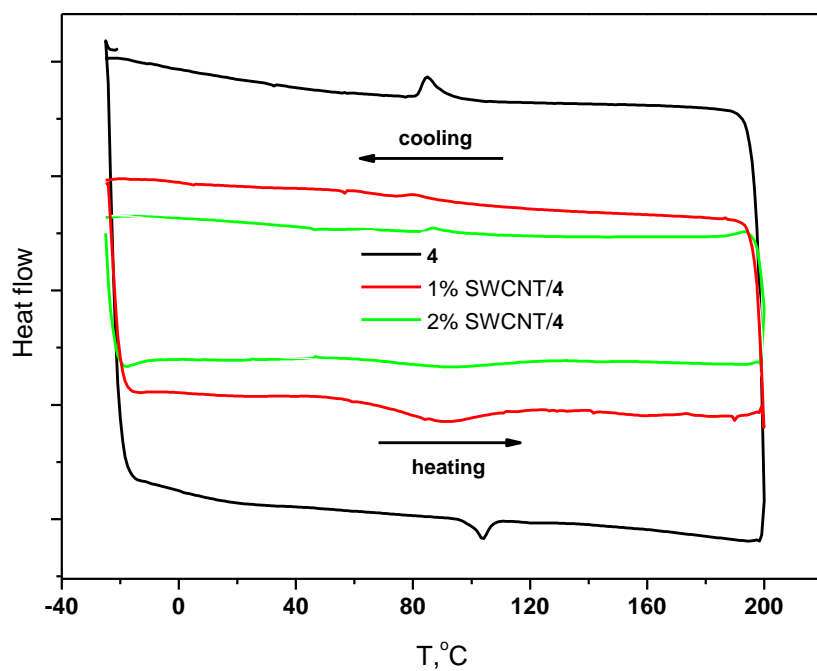

**Figure S5.** DSC spectra of compound **4** and its composites (third heating-cooling cycle,  $10^{\circ}\text{C}\cdot\text{min}^{-1}$ ).

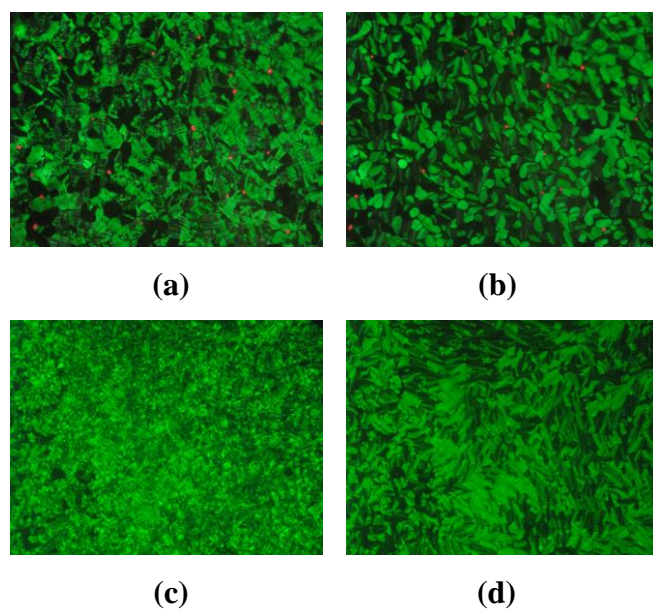

**Figure S6.** Polarizing optical microscopy images of **3/SWCNT** composites obtained by annealing between two glass slides. a: %1 **3/SWCNT** at 160 °C, b: %1 **3/SWCNT** at 175 °C, c: %2 **3/SWCNT** at 170 °C, d: %2 **3/SWCNT** at 185 °C. Magnification: 25X

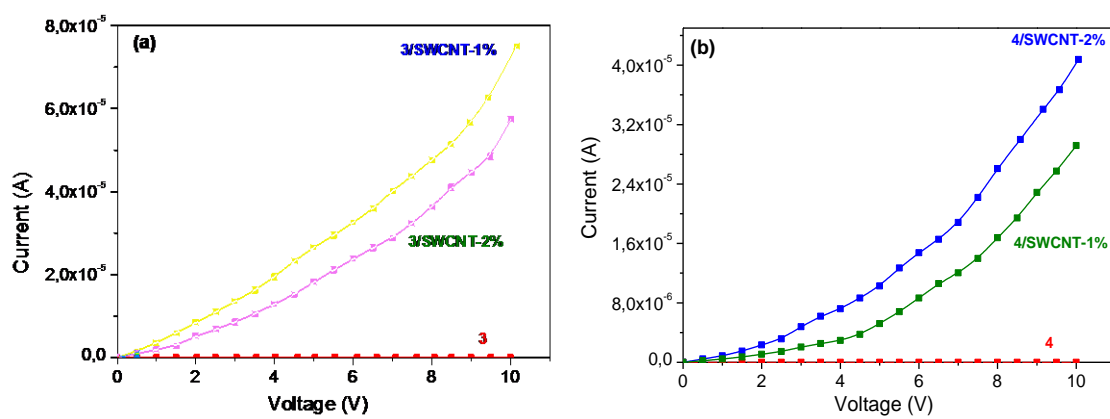

**Figure S7.** *I(V)* characteristics of films of pure **3** (a) and **4** (b) derivatives and their composites **3/SWCNT** and **4/SWCNT** containing 1 and 2 wt.% of SWCNT.
